# Supplementary material for: Tumorous IRE1α facilitates CD8+T cells-dependent anti-tumor immunity and improves immunotherapy efficacy in melanoma
Source: Springer Nature journal article supplement (doi:10.1186/s12964-024-01470-8), 2024-01-30

**Fig. 4A- left**

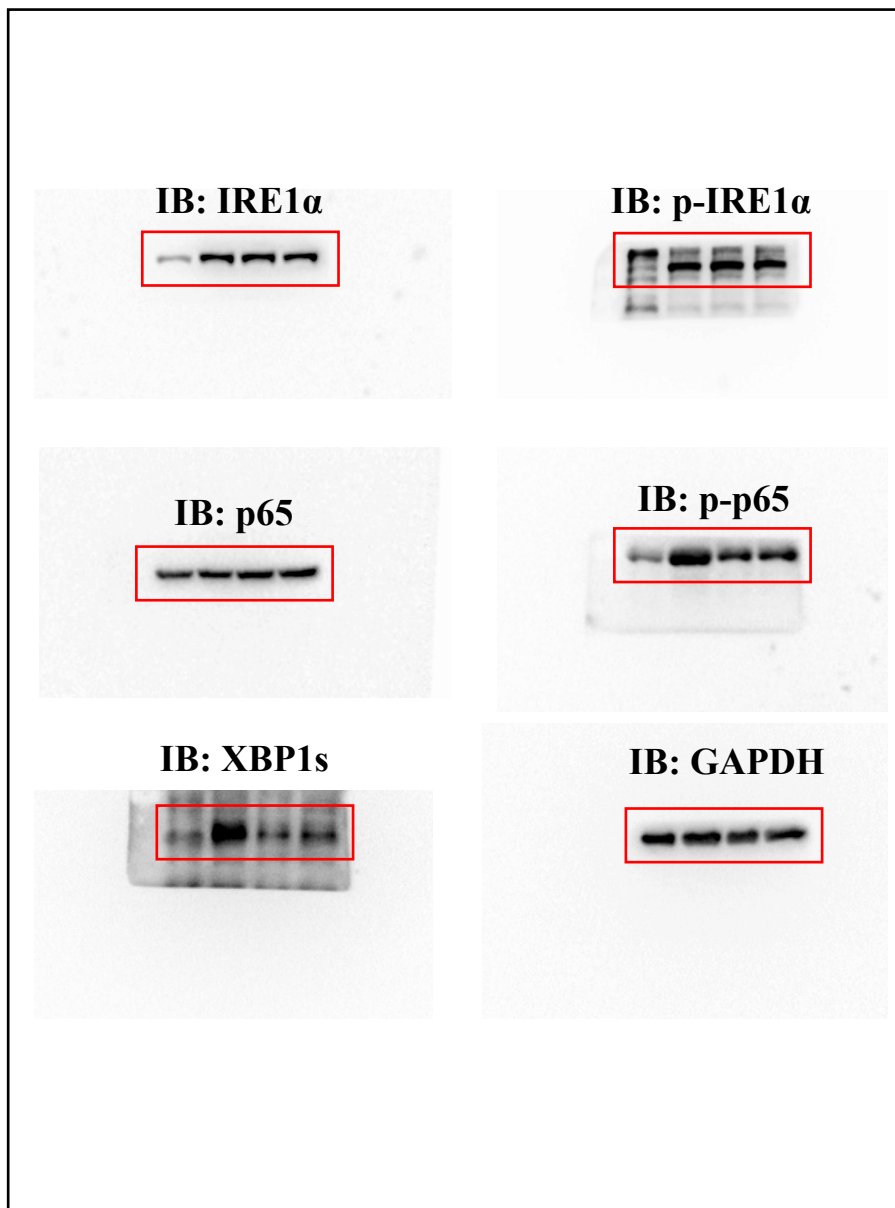

**Fig. 4A- right**

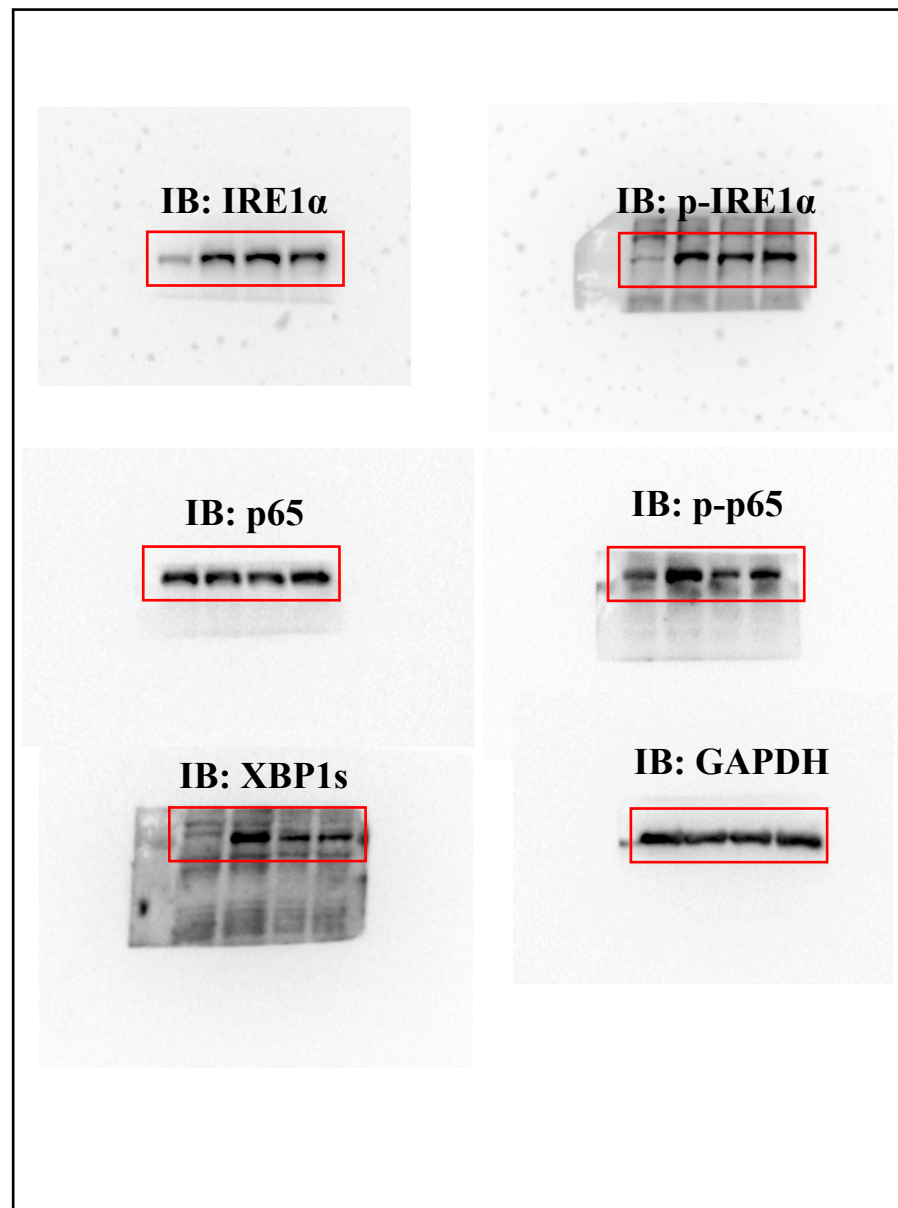

**Fig. 4D- left**

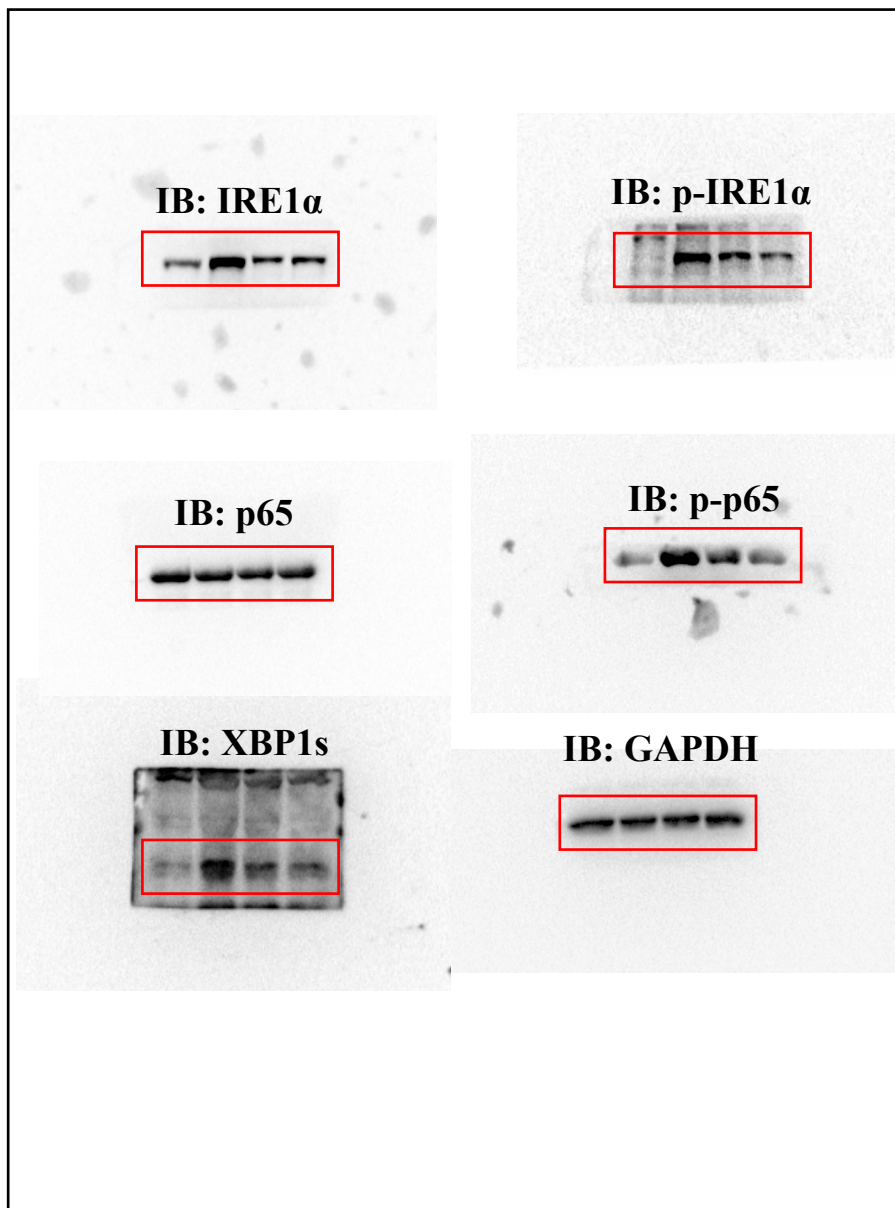

**Fig. 4D- right**

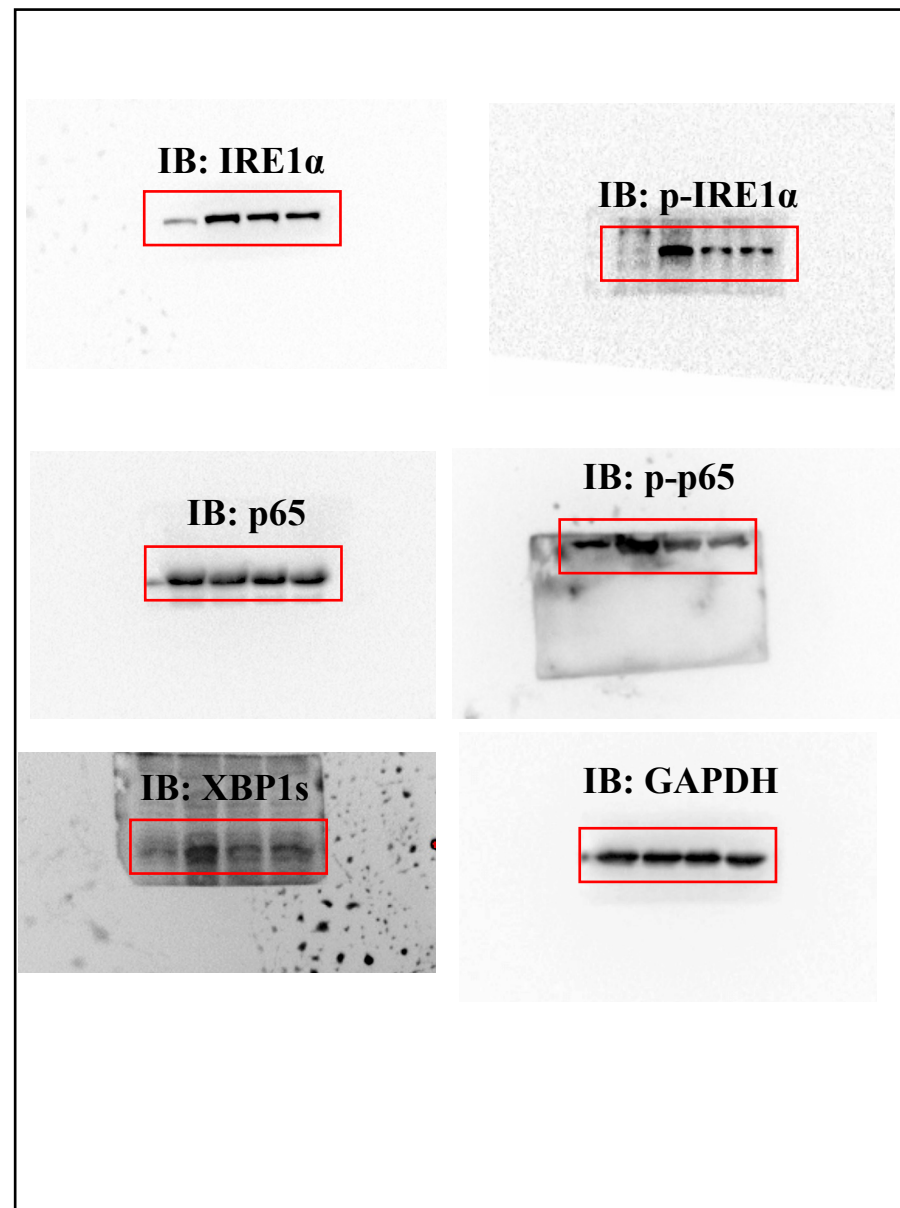

**Fig. S2B**

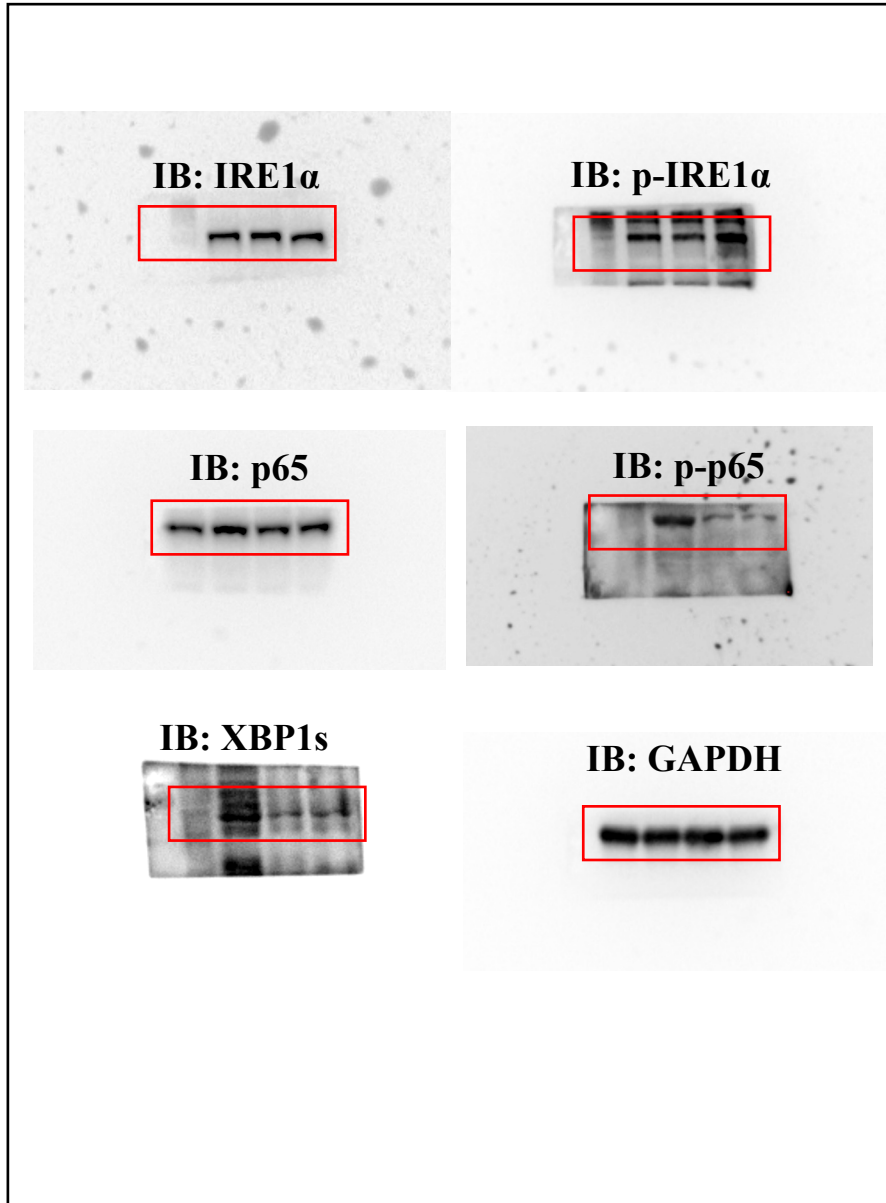

**Fig. S3A**

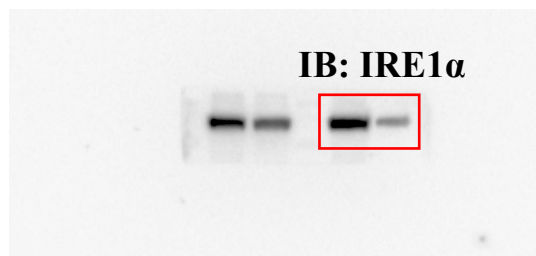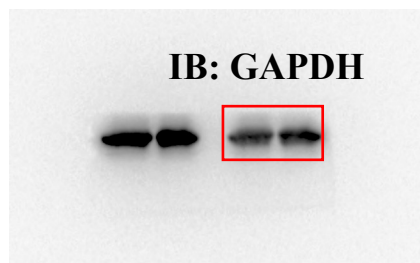

**Fig. S3B**

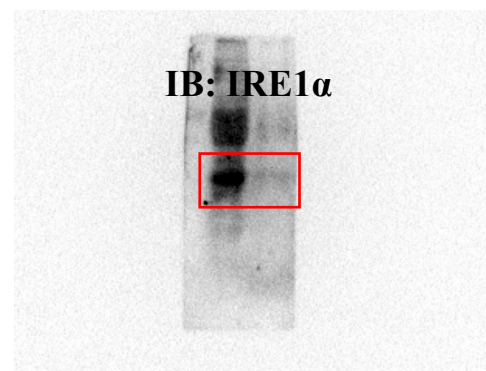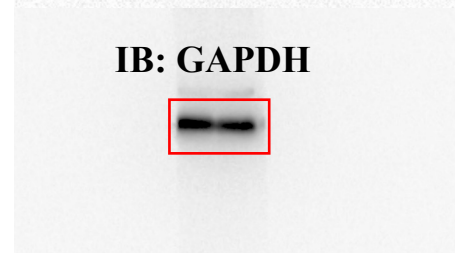

**Fig. S4B- left**

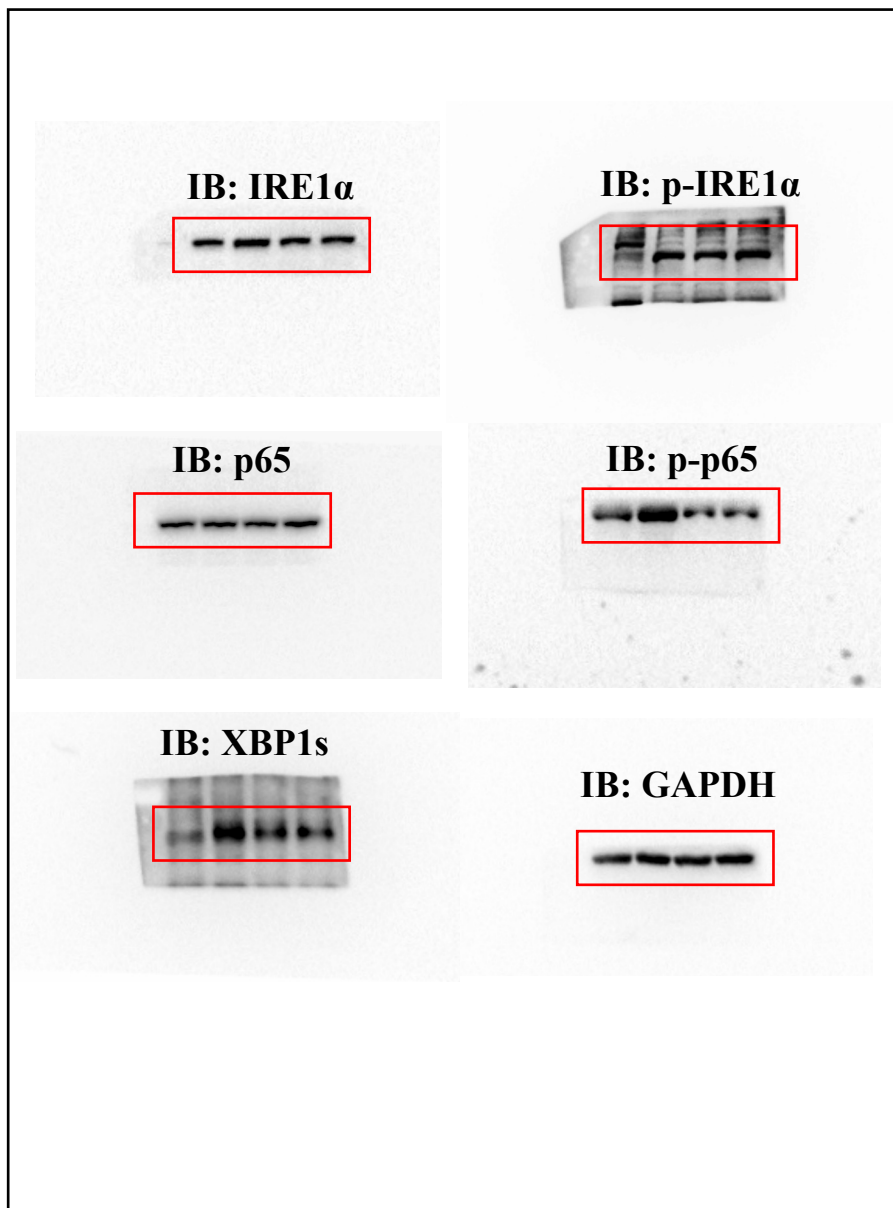

**Fig. S4B- right**

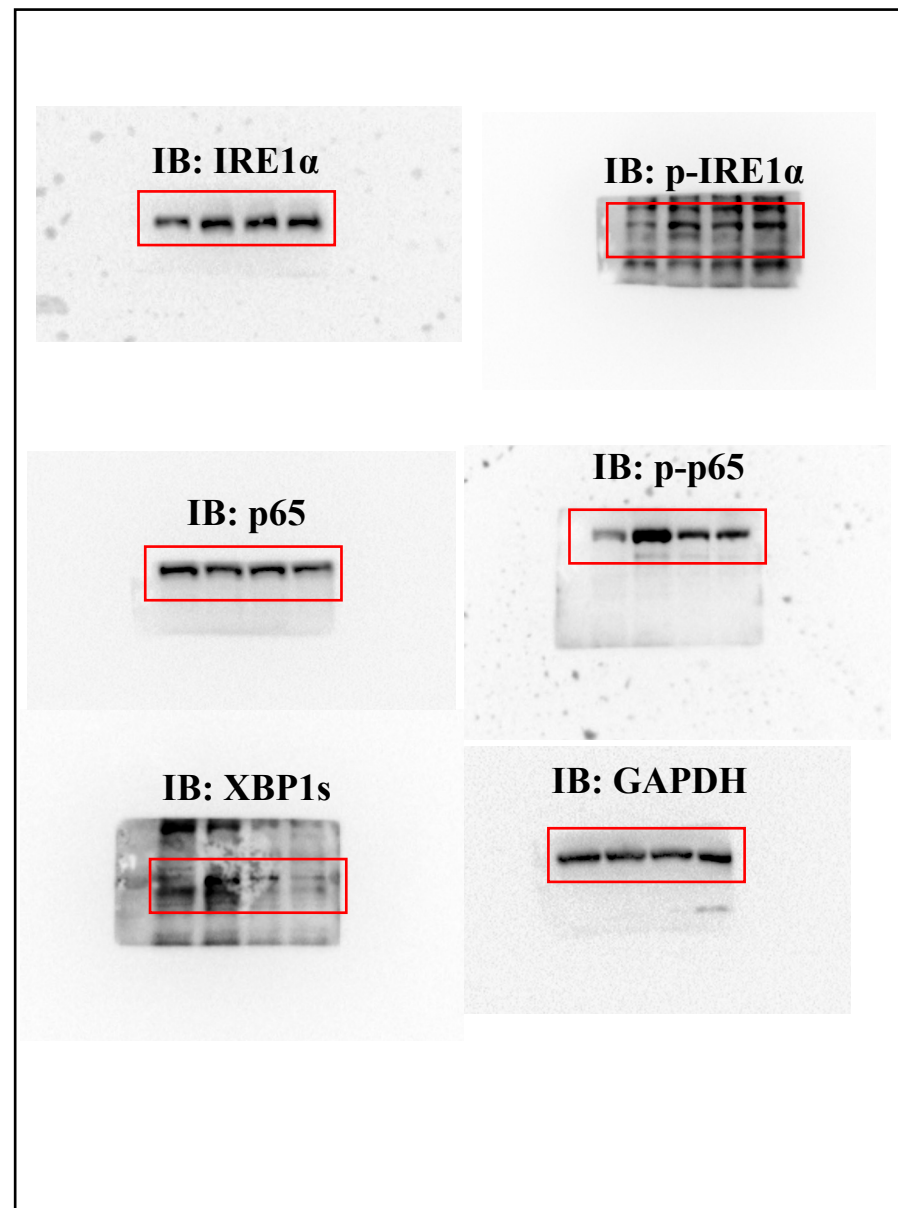

**Fig. S4G- left**

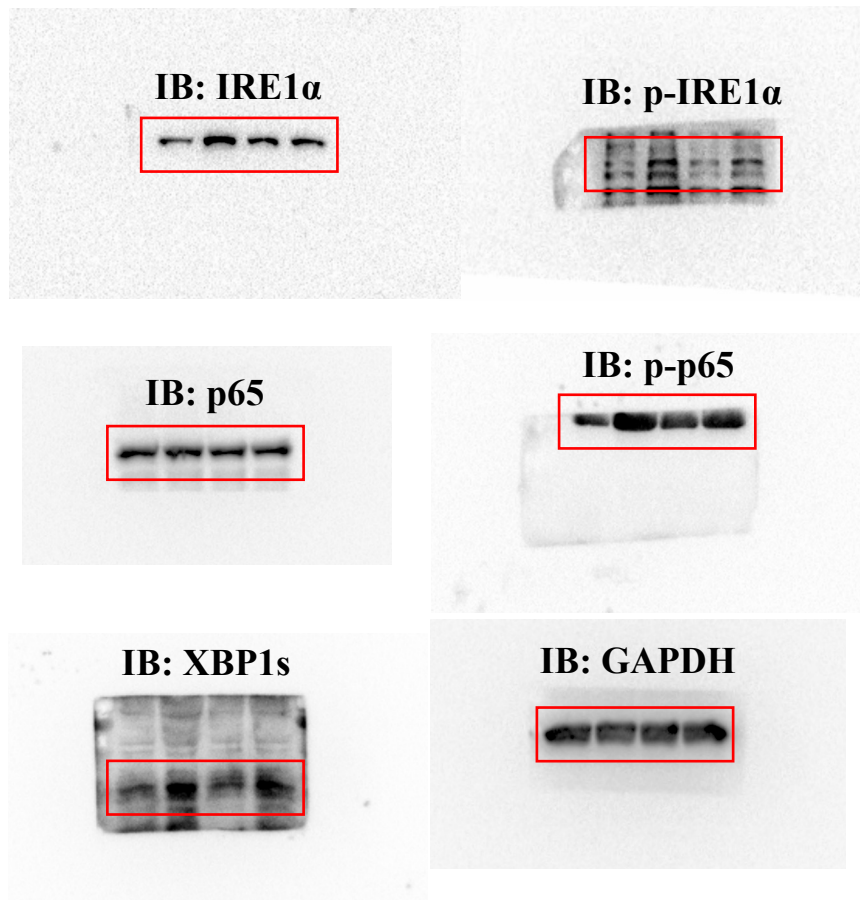

**Fig. S4G- right**

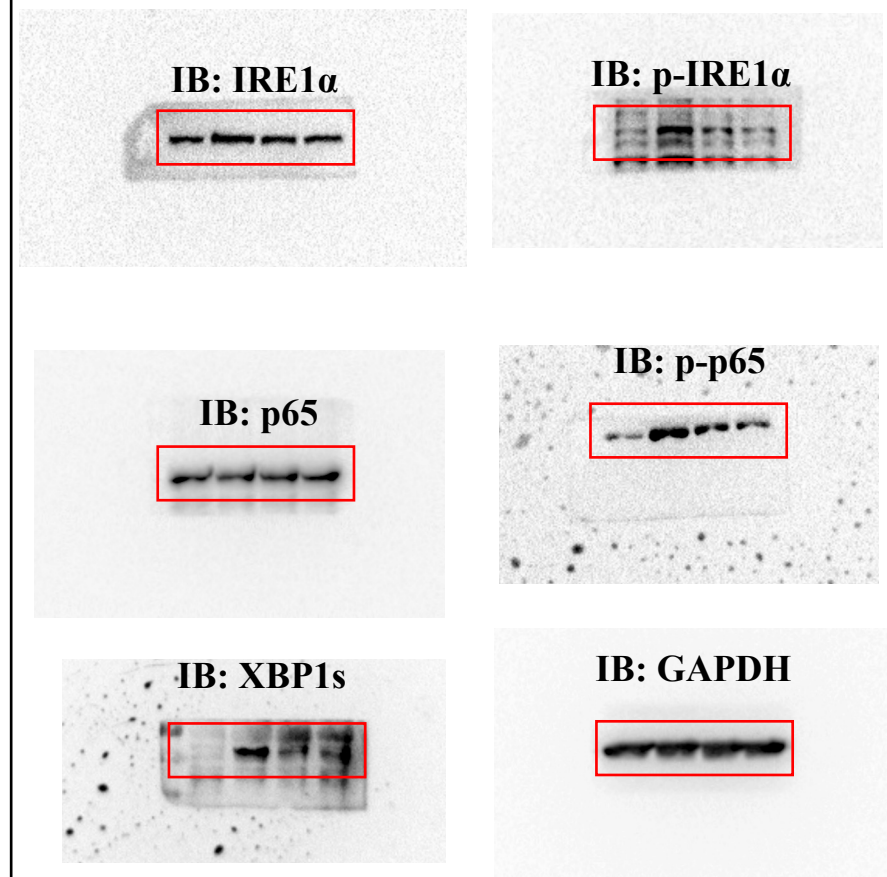

**Fig. S4I- 1**

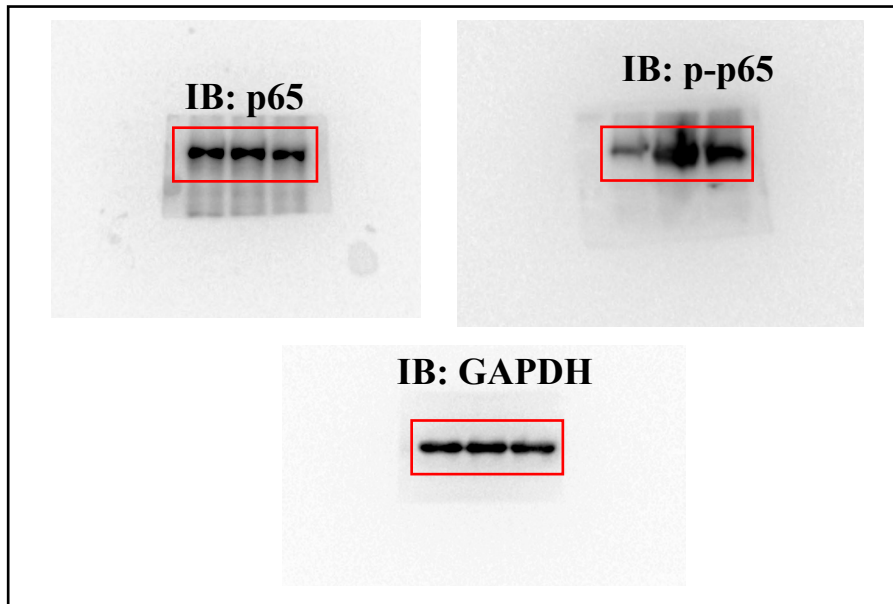

**Fig. S4I- 2**

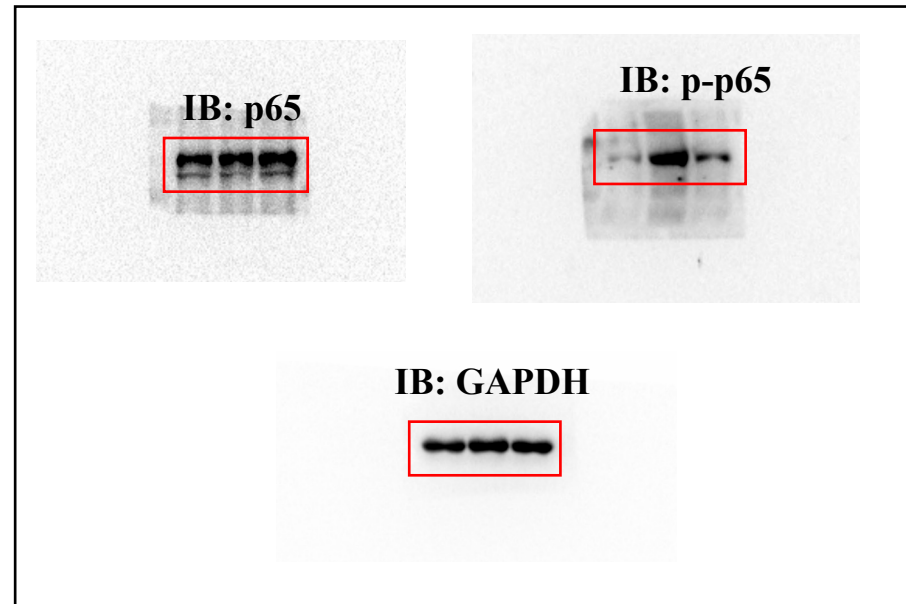

**Fig. S4I- 3**

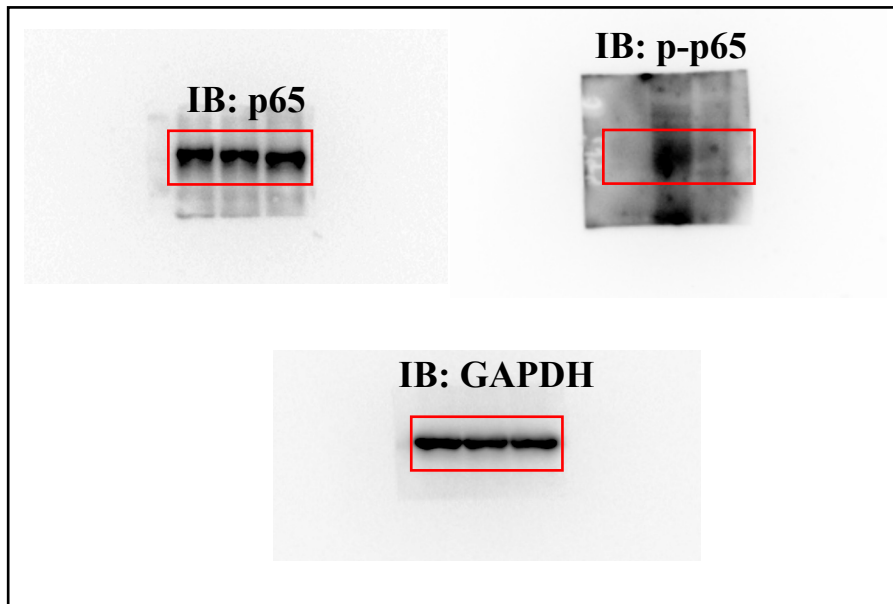

**Fig. S4I- 4**

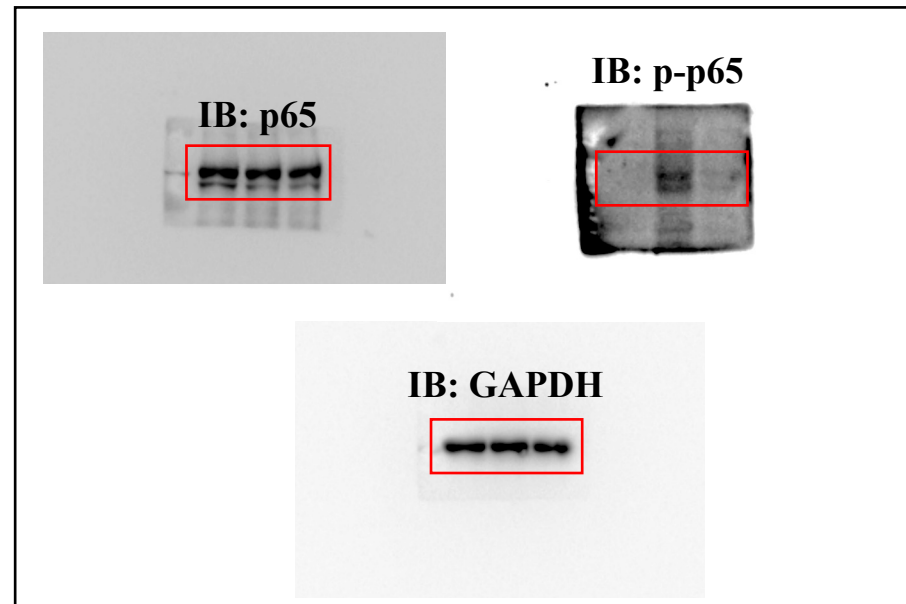

**Fig. S5C**

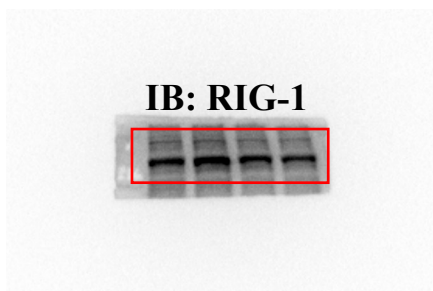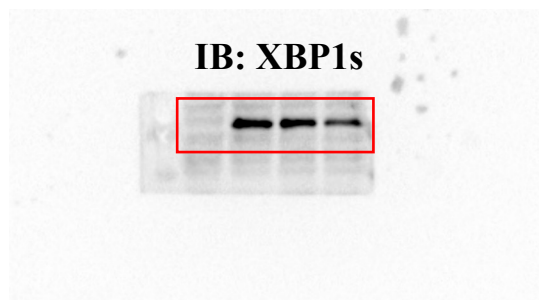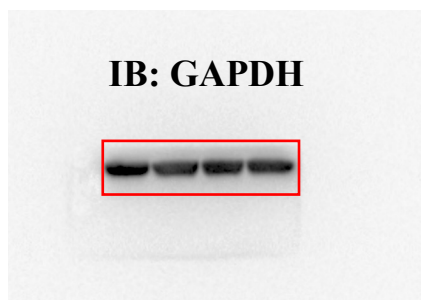

**Fig. S5E**

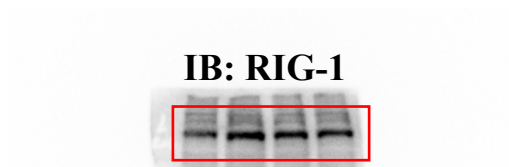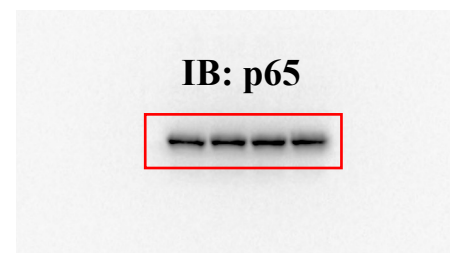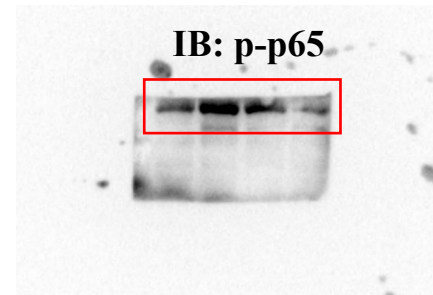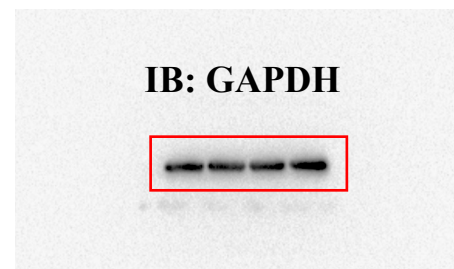



**Fig. S8C- left**

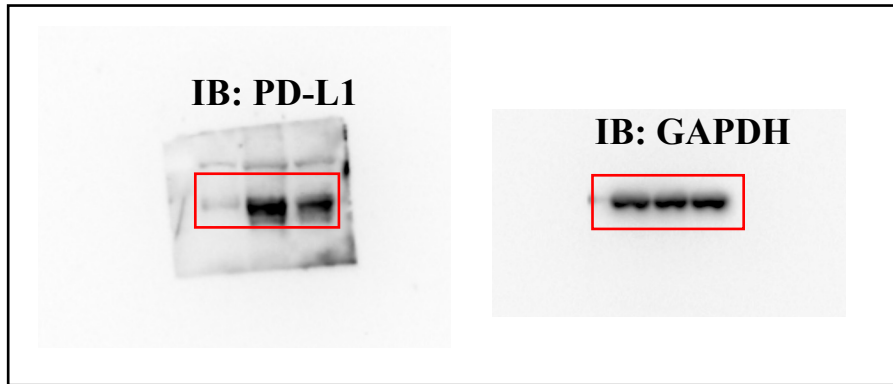

**Fig. S8C- right**

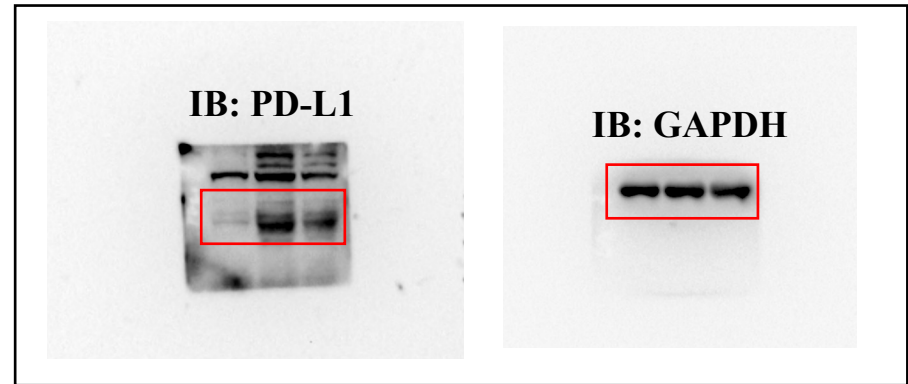

**Fig. S8F- A2058 left**

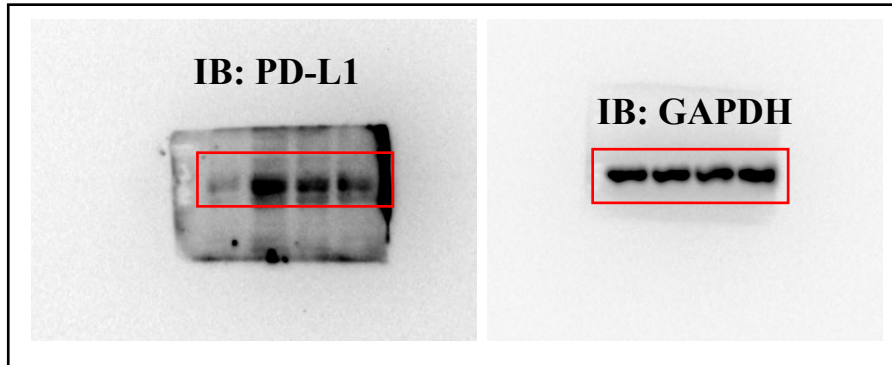

**Fig. S8F- A2058 right**

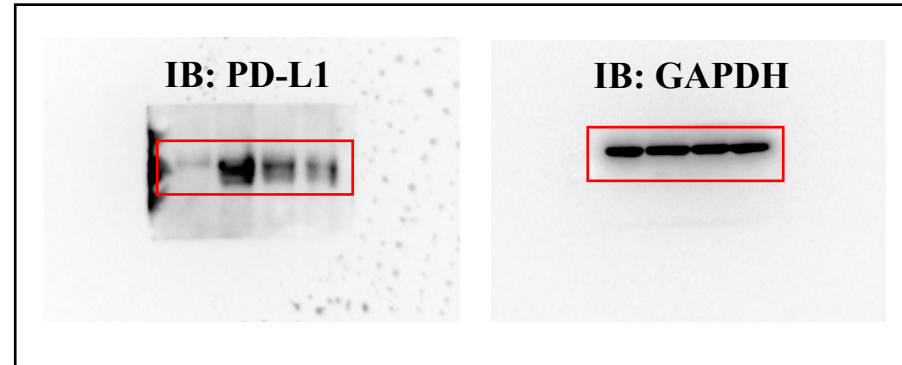

**Fig. S8F- A375 left**

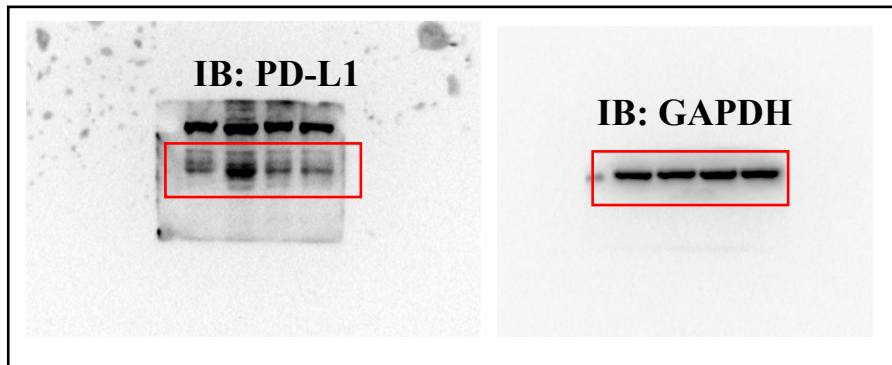

**Fig. S8F- A375 right**

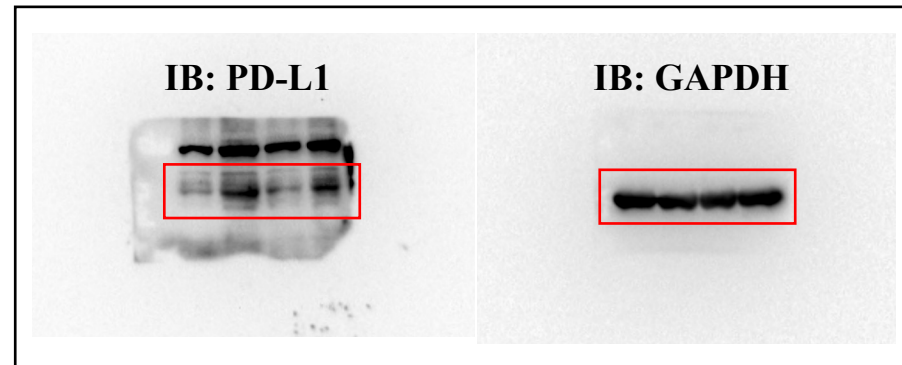

**Fig. S8I- A2058 left**

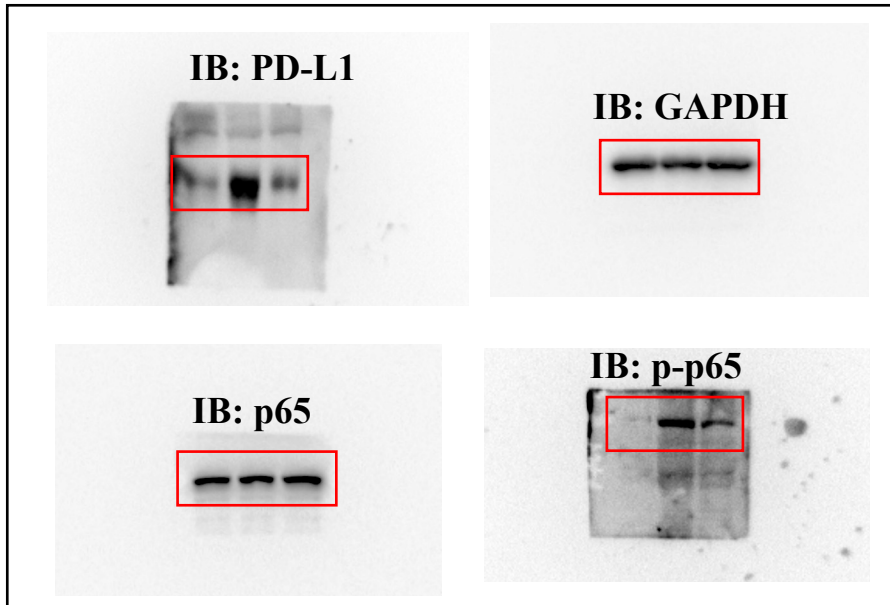

**Fig. S8I- A2058 right**

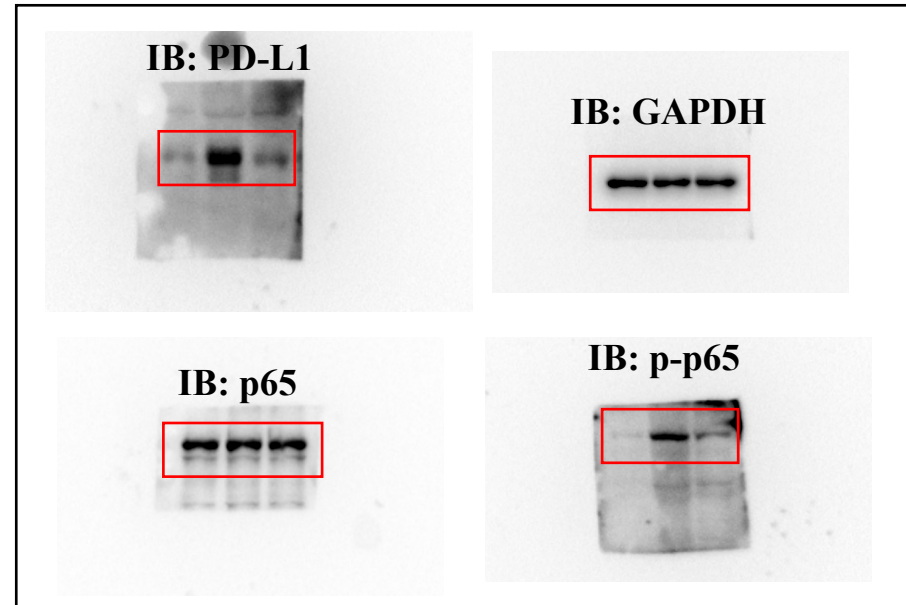

**Fig. S8I- A375 left**

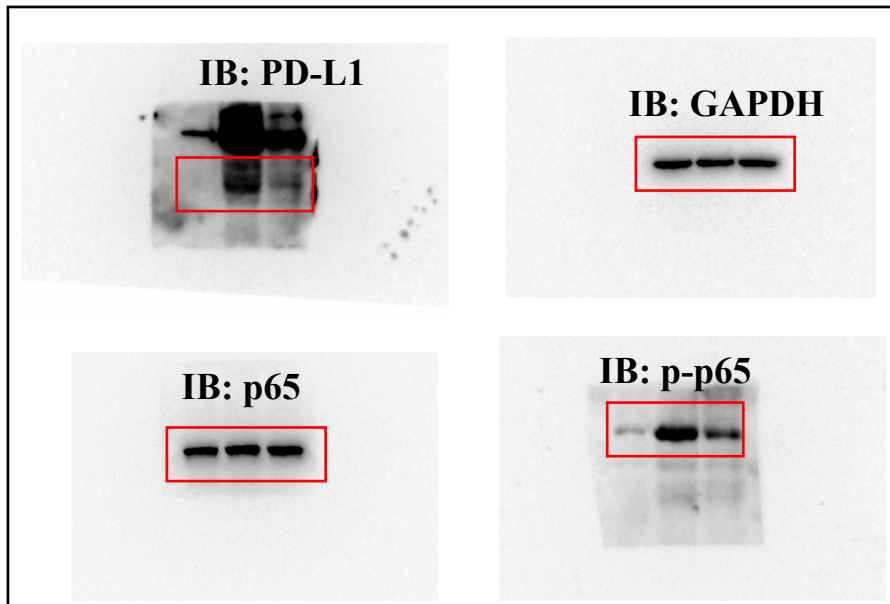

**Fig. S8I- A375 right**

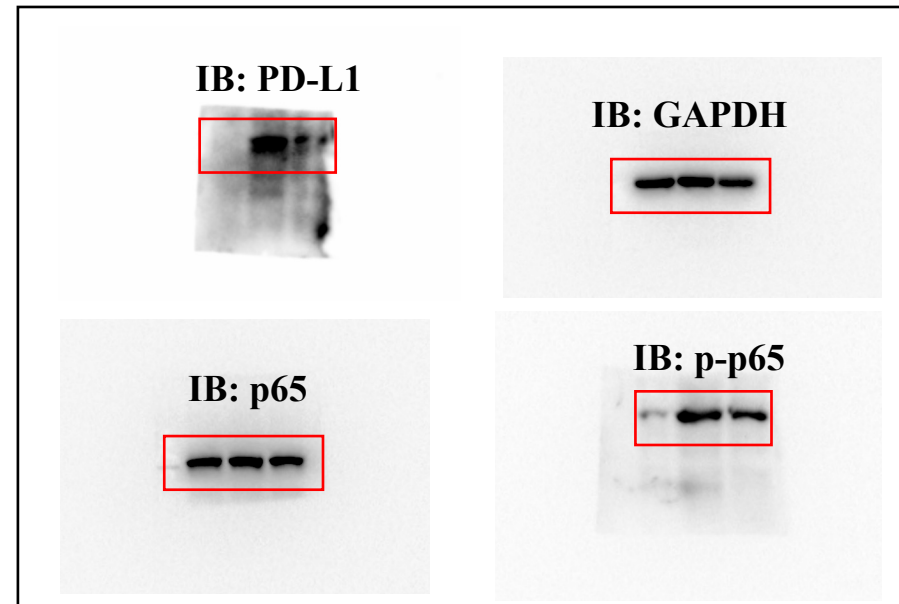

Supplement: 12964_2024_1470_MOESM4_ESM.pdf [file 12964_2024_1470_MOESM4_ESM.pdf]
